# Supplementary material for: Monomeric organoantimony(iii) sulphide and selenide with terminal Sb–E bond (E = S, Se). Synthesis, structure and theoretical consideration
Source: Royal Society of Chemistry journal article supplement (doi:10.1039/c2dt30146f), 2012-01-01
Supplement: c2dt30146f.pdf [file c2dt30146f.pdf]

## Supplementary materials for:

# Monomeric Organoantimony(III) Sulphide and Selenide with Terminal Sb-S(Se) Bond. Syntheses, Structures and Theoretical Consideration.

Petr Šimon, Roman Jambor, Aleš Růžička, Antonín Lyčka, Frank De Proft and Libor Dostál\*

\*Department of General and Inorganic Chemistry, Faculty of Chemical Technology,  
University of Pardubice, Studentská 573, CZ - 532 10, Pardubice, Czech Republic

Fax: +420466037068; Tel: +420466037163; E-mail: libor.dostal@upce.cz

## Details of DFT calculations

All molecular structures were computed using the Gaussian 09 program<sup>[S1]</sup> at the B3LYP level of theory<sup>[S2]</sup> using the cc-pVTZ basis set<sup>[S3]</sup> on all atoms, except for Sb and Te for which the SDB-cc-pVTZ basis set<sup>[S4]</sup> was used.

On the optimized structures, given below, an NBO analysis<sup>[S5]</sup> was performed in order to probe the bonding features of the Sb-E bond; in addition, the Wiberg bond order<sup>[S6]</sup> for these bonds were computed.

Molecular structures of compounds 3 and 4 were optimized previously, see ref. S7.

- [1] Gaussian 09, Revision B.01, Frisch, M. J.; Trucks, G. W.; Schlegel, H. B.; Scuseria, G. E.; Robb, M. A.; Cheeseman, J. R.; Scalmani, G.; Barone, V.; Mennucci, B.; Petersson, G. A.; Nakatsuji, H.; Caricato, M.; Li, X.; Hratchian, H. P.; Izmaylov, A. F.; Bloino, J.; Zheng, G.; Sonnenberg, J. L.; Hada, M.; Ehara, M.; Toyota, K.; Fukuda, R.; Hasegawa, J.; Ishida, M.; Nakajima, T.; Honda, Y.; Kitao, O.; Nakai, H.; Vreven, T.; Montgomery, Jr., J. A.; Peralta, J. E.; Ogliaro, F.; Bearpark, M.; Heyd, J. J.; Brothers, E.; Kudin, K. N.; Staroverov, V. N.; Kobayashi, R.; Normand, J.; Raghavachari, K.; Rendell, A.; Burant, J. C.; Iyengar, S. S.; Tomasi, J.; Cossi, M.; Rega, N.; Millam, N. J.; Klene, M.; Knox, J. E.; Cross, J. B.; Bakken, V.; Adamo, C.; Jaramillo, J.; Gomperts, R.; Stratmann, R. E.; Yazyev, O.; Austin, A. J.; Cammi, R.; Pomelli, C.; Ochterski, J. W.; Martin, R. L.; Morokuma, K.; Zakrzewski, V. G.; Voth, G. A.; Salvador, P.; Dannenberg, J. J.; Dapprich, S.; Daniels, A. D.; Farkas, Ö.; Foresman, J. B.; Ortiz, J. V.; Cioslowski, J.; Fox, D. J. Gaussian, Inc., Wallingford CT, 2009.
- [2] (a) Becke, A.D. *J. Chem. Phys.* **1993**, *98*, 5648.  
(b) Lee, C.; Yang, W.; Parr, R.G. *Phys. Rev. B* **1988**, *37*, 785.  
(c) Stephens, P.J.; Devlin, F.J.; Chabalowski, C.F.; Frisch, M.J. *J. Phys. Chem.* **1994**, *98*, 11623.

- [3] Hydrogen and 1<sup>st</sup>-row: Kendall, R.A.; Dunning, T.H.; Harrison, R.J. *J. Chem. Phys.* **1992**, *96*, 6796. 2<sup>nd</sup> row: Woon, D.E.; Dunning T.H. *J. Chem. Phys.* **1993**, *98*, 1358. 3<sup>rd</sup> row: Wilson, A.K.; Woon, D.E.; Peterson, K.A.; Dunning Jr., T.H. *J. Chem. Phys.* **1999**, *110*, 7667.
- [4] Martin, J. M. L.; Sunderman, A. *J. Chem. Phys.* **2001**, *114*, 3408.
- [5] (a) Foster, J. P.; Weinhold, F. *J. Am. Chem. Soc.* **1980**, *102*, 7211.  
(b) Reed, A. E.; Weinhold, F. *J. Chem. Phys.* **1983**, *78*, 4066.  
(c) Reed, A. E.; Curtiss, L. A. Weinhold, F. *Chem. Rev.* **1988**, *88*, 899.  
(d) Weinhold, F. In *Encyclopedia of Computational Chemistry*, Schleyer, P. v. R.; Allinger, N. L.; Clark, T.; Gasteiger, J.; Kollman, P. A.; Schaefer III, H. F.; Schreiner, P. R. Eds., John Wiley & Sons, Chichester, UK, 1998, *Vol. 3*, p. 1792.  
(e) Weinhold, F.; Landis, C. *Valency and Bonding, A Natural Bond Orbital Donor-Acceptor Perspective*; Cambridge University Press: Cambridge, 2005.
- [6] Wiberg, K. B. *Tetrahedron* **1968**, *24*, 1083.
- [7] L. Dostál, R. Jambor, A. Růžička, A. Lyčka, J. Brus, F. de Proft, *Organometallics* **2008**, *27*, 6059.

### 1. Cartesian coordinates (Å) for compound 1

|    |           |           |           |
|----|-----------|-----------|-----------|
| Sb | -0.000197 | -0.537399 | 0.085187  |
| S  | -0.000251 | -1.086668 | -2.140218 |
| N  | -2.381337 | 0.283141  | 0.144051  |
| C  | 0.000032  | 1.633074  | 0.093787  |
| C  | 4.141611  | -0.924802 | -1.052120 |
| C  | 3.500352  | -0.599324 | 0.153906  |
| N  | 2.381466  | 0.283084  | 0.143810  |
| C  | 0.000078  | 4.426378  | 0.118880  |
| H  | 0.000108  | 5.507581  | 0.119062  |
| C  | 4.928717  | -2.103023 | 1.364056  |
| H  | 5.231664  | -2.560371 | 2.297289  |
| C  | 2.475166  | 1.561552  | 0.137521  |
| C  | -1.209897 | 2.334133  | 0.115699  |
| C  | 3.722850  | -0.303970 | -2.357644 |
| H  | 4.005742  | 0.751194  | -2.410820 |
| H  | 4.205910  | -0.811881 | -3.190817 |
| H  | 2.642209  | -0.365805 | -2.494382 |
| C  | 3.879641  | -1.186703 | 1.371155  |
| C  | -3.500221 | -0.599304 | 0.154057  |
| C  | 1.209997  | 2.334073  | 0.115593  |
| C  | -2.475057 | 1.561625  | 0.137765  |
| C  | -4.141663 | -0.924410 | -1.051978 |
| C  | 3.784813  | 2.300784  | 0.165353  |
| H  | 4.624270  | 1.614298  | 0.210641  |
| H  | 3.887481  | 2.922155  | -0.725705 |
| H  | 3.826237  | 2.966044  | 1.029087  |
| C  | -3.784697 | 2.300838  | 0.165817  |
| H  | -4.624160 | 1.614354  | 0.211032  |
| H  | -3.826009 | 2.965918  | 1.029687  |
| H  | -3.887458 | 2.922401  | -0.725106 |
| C  | 3.184054  | -0.831645 | 2.658867  |
| H  | 3.306748  | 0.224592  | 2.910056  |
| H  | 2.110696  | -1.019435 | 2.599414  |
| H  | 3.584875  | -1.417545 | 3.484364  |
| C  | 5.578244  | -2.436919 | 0.184964  |
| H  | 6.385504  | -3.156948 | 0.194807  |
| C  | 5.183296  | -1.850067 | -1.007844 |
| H  | 5.682717  | -2.115209 | -1.930788 |
| C  | -1.202219 | 3.733582  | 0.122400  |
| H  | -2.128420 | 4.290640  | 0.129557  |
| C  | -3.879298 | -1.187076 | 1.371172  |
| C  | 1.202348  | 3.733521  | 0.122323  |
| H  | 2.128565  | 4.290550  | 0.129490  |
| C  | -4.928320 | -2.103462 | 1.363948  |
| H  | -5.231078 | -2.561132 | 2.297082  |
| C  | -5.183299 | -1.849732 | -1.007828 |

|   |           |           |           |
|---|-----------|-----------|-----------|
| H | -5.682890 | -2.114568 | -1.930764 |
| C | -3.183575 | -0.832343 | 2.658905  |
| H | -3.306076 | 0.223880  | 2.910242  |
| H | -3.584460 | -1.418293 | 3.484333  |
| H | -2.110252 | -1.020316 | 2.599384  |
| C | -3.723085 | -0.303212 | -2.357386 |
| H | -2.642518 | -0.365536 | -2.494510 |
| H | -4.206703 | -0.810529 | -3.190593 |
| H | -4.005431 | 0.752121  | -2.410023 |
| C | -5.578014 | -2.437006 | 0.184856  |
| H | -6.385227 | -3.157091 | 0.194581  |

E (B3LYP) = -1520.63398 a.u.

## **2. Cartesian coordinates (Å) for compound 2**

|    |           |           |           |
|----|-----------|-----------|-----------|
| Sb | 0.000000  | -0.428696 | 0.273225  |
| Se | -0.000120 | -1.277674 | -2.011622 |
| N  | 2.378702  | 0.384081  | 0.249400  |
| C  | 0.000017  | 1.722800  | 0.053045  |
| N  | -2.378678 | 0.384122  | 0.249432  |
| C  | -4.176350 | -0.911159 | -0.794524 |
| C  | 3.497552  | -0.491870 | 0.361100  |
| C  | 2.474045  | 1.656332  | 0.117184  |
| C  | -3.497514 | -0.491846 | 0.361145  |
| C  | 4.176349  | -0.911213 | -0.794595 |
| C  | -1.210699 | 2.422216  | 0.007580  |
| C  | 4.891226  | -1.888417 | 1.730805  |
| H  | 5.167372  | -2.266693 | 2.706731  |
| C  | 3.842823  | -0.976746 | 1.632953  |
| C  | -3.842736 | -0.976756 | 1.633009  |
| C  | -4.891112 | -1.888449 | 1.730874  |
| H  | -5.167233 | -2.266744 | 2.706802  |
| C  | 1.210738  | 2.422194  | 0.007551  |
| C  | -1.202367 | 3.815065  | -0.127457 |
| H  | -2.128649 | 4.369881  | -0.175026 |
| C  | -2.474015 | 1.656369  | 0.117215  |
| C  | 3.805267  | -0.396449 | -2.159422 |
| H  | 4.114604  | 0.643709  | -2.296540 |
| H  | 4.297370  | -0.984745 | -2.932197 |
| H  | 2.728095  | -0.449038 | -2.321905 |
| C  | 3.784410  | 2.394145  | 0.089531  |
| H  | 4.620860  | 1.715723  | 0.224386  |
| H  | 3.905527  | 2.916170  | -0.861052 |
| H  | 3.811480  | 3.147907  | 0.877722  |
| C  | 0.000035  | 4.503714  | -0.202548 |
| H  | 0.000041  | 5.579343  | -0.312009 |
| C  | 5.574171  | -2.316846 | 0.602307  |
| H  | 6.379918  | -3.032797 | 0.693974  |
| C  | 5.215322  | -1.828591 | -0.644693 |
| H  | 5.741917  | -2.166214 | -1.528003 |
| C  | 1.202426  | 3.815048  | -0.127485 |
| H  | 2.128716  | 4.369847  | -0.175089 |
| C  | -3.784382 | 2.394175  | 0.089490  |
| H  | -4.620809 | 1.715790  | 0.224674  |
| H  | -3.811376 | 3.148216  | 0.877418  |
| H  | -3.905610 | 2.915860  | -0.861265 |
| C  | 3.118110  | -0.514829 | 2.869906  |
| H  | 3.508036  | -1.020131 | 3.751950  |
| H  | 3.227406  | 0.560834  | 3.026938  |
| H  | 2.047682  | -0.717621 | 2.809273  |
| C  | -5.574084 | -2.316876 | 0.602384  |

|   |           |           |           |
|---|-----------|-----------|-----------|
| H | -6.379809 | -3.032848 | 0.694069  |
| C | -3.805366 | -0.396332 | -2.159354 |
| H | -4.297561 | -0.984559 | -2.932121 |
| H | -4.114666 | 0.643845  | -2.296378 |
| H | -2.728206 | -0.448958 | -2.321928 |
| C | -3.117997 | -0.514856 | 2.869951  |
| H | -3.507942 | -1.020130 | 3.752003  |
| H | -2.047578 | -0.717703 | 2.809316  |
| H | -3.227235 | 0.560813  | 3.026970  |
| C | -5.215295 | -1.828579 | -0.644609 |
| H | -5.741901 | -2.166194 | -1.527915 |

E (B3LYP) = -3524.05086 4a.u.

### **3. Cartesian coordinates (Å) for the hypothetical compound PhSbS**

|    |           |           |           |
|----|-----------|-----------|-----------|
| Sb | -0.571154 | -0.440044 | -0.511533 |
| S  | 1.484436  | -1.206256 | -0.991746 |
| C  | -0.254006 | 1.668134  | -0.187388 |
| C  | 0.041033  | 4.407922  | 0.253967  |
| H  | 0.158014  | 5.469992  | 0.424566  |
| C  | -1.362021 | 2.458364  | 0.139196  |
| C  | 1.003999  | 2.26744   | -0.290072 |
| C  | -1.215869 | 3.823294  | 0.359217  |
| H  | -2.077173 | 4.427719  | 0.611423  |
| C  | 1.150286  | 3.629658  | -0.070704 |
| H  | 2.126964  | 4.088627  | -0.151803 |
| H  | 1.862601  | 1.65714   | -0.542557 |
| H  | -2.346884 | 2.01206   | 0.223588  |

E (B3LYP) = -635.40566 a.u.

**4. Cartesian coordinates (Å) for the hypothetical compound PhSbSe**

|    |           |           |           |
|----|-----------|-----------|-----------|
| Sb | -0.719617 | -0.936814 | -0.000041 |
| Se | -2.127645 | 0.979287  | 0.000042  |
| C  | 1.276269  | -0.119143 | 0.000065  |
| C  | 1.554214  | 1.250307  | -0.000027 |
| C  | 2.339676  | -1.029568 | 0.000103  |
| C  | 2.867431  | 1.698258  | -0.000081 |
| H  | 3.075661  | 2.760243  | -0.000204 |
| C  | 3.918638  | 0.783668  | -0.000027 |
| H  | 4.941509  | 1.136465  | -0.000036 |
| C  | 3.655475  | -0.581176 | 0.000066  |
| H  | 4.470838  | -1.292494 | 0.0002    |
| H  | 2.146277  | -2.096509 | 0.000167  |
| H  | 0.735892  | 1.959996  | -0.000044 |

E (B3LYP) = -2638.82405 4a.u.



**5. Cartesian coordinates (Å) for the hypothetical compound PhSbTe**

|    |           |           |           |
|----|-----------|-----------|-----------|
| Sb | -0.680205 | -0.411392 | -0.484781 |
| Te | 1.590682  | -1.425701 | -1.157866 |
| C  | -0.276371 | 1.6854    | -0.176163 |
| C  | 0.057133  | 4.424164  | 0.267444  |
| H  | 0.189481  | 5.48433   | 0.438384  |
| C  | -1.362191 | 2.483868  | 0.203869  |
| C  | 0.978644  | 2.279135  | -0.330568 |
| C  | -1.197051 | 3.84651   | 0.424805  |
| H  | -2.043079 | 4.45392   | 0.718222  |
| C  | 1.144215  | 3.638917  | -0.110374 |
| H  | 2.120289  | 4.09012   | -0.232528 |
| H  | 1.824393  | 1.669664  | -0.624258 |
| H  | -2.345714 | 2.045116  | 0.329966  |

E (B3LYP) = -245.27752 a.u.
